# Supplementary material for: An Overview of the Current Trends in Marine Plastic Litter Management for a Sustainable Development
Source: MDPI journal article supplement (doi:10.3390/recycling9020030), 2024-04-09
Supplement: s1 [file s1]

# Supplementary Material: An Overview of the Current Trends in Marine Plastic Litter Management for a Sustainable Development

Maria Râpă <sup>1</sup>, Elfrida M. Cârstea <sup>2</sup>, Anca A. Șăulean <sup>1,\*</sup>, Cristina L. Popa <sup>2,\*</sup>, Ecaterina Matei <sup>1</sup>, Andra M. Predescu <sup>1</sup>, Cristian Predescu <sup>1</sup>, Simona I. Donțu <sup>2</sup> and Alexandra G. Dincă <sup>1</sup>

<sup>1</sup> Faculty of Materials Science and Engineering, National University of Science and Technology Politehnica Bucharest, 060042 Bucharest, Romania; maria.rapa@upb.ro (M.R.); ecaterina.matei@upb.ro (E.M.); andra.predescu@upb.ro (A.M.P.); cristian.predescu@upb.ro (C.P.); stancualexandragabriela@gmail.com (A.G.D.)

<sup>2</sup> National Institute of R&D for Optoelectronics INOE 2000, Atomistilor 409, 077125 Magurele, Romania; elfrida.carstea@inoe.ro (E.M.C.); simona.dontu@inoe.ro (S.I.D.)

\* Correspondence: anca.turcanu@upb.ro (A.A.Ș.); cristina.popa@inoe.ro (C.L.P.)

**Citation:** Râpă, M.; Cârstea, E.M.; Șăulean, A.A.; Popa, C.L.; Matei, E.; Predescu, A.M.; Predescu, C.; Donțu, S.I.; Dincă, A.G. An Overview of the Current Trends in Marine Plastic Litter Management for a Sustainable Development. *Recycling* **2024**, *9*, 30. <https://doi.org/10.3390/recycling9020030>

Academic Editor: Giovanni De Feo

Received: 4 March 2024

Revised: 29 March 2024

Accepted: 6 April 2024

Published: 9 April 2024

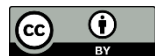

**Copyright:** © 2024 by the authors. Submitted for possible open access publication under the terms and conditions of the Creative Commons Attribution (CC BY) license (<https://creativecommons.org/licenses/by/4.0/>).

**Table S1.** The actions supporting the management of marine macro- and microplastic litter.

| Action name                                                                                                               | Purpose of action                                                                                                                  | Year of issue/dev elopment | Region of action | Type of action (legislation/s trategy/plan/ program) | Initiating body                     |
|---------------------------------------------------------------------------------------------------------------------------|------------------------------------------------------------------------------------------------------------------------------------|----------------------------|------------------|------------------------------------------------------|-------------------------------------|
| Waste Management a Public Cleansing Act                                                                                   | control of waste generation, waste treatment, reduce emissions, increase recovery rate, improve cost efficiency of waste treatment | 1970                       | Japan            | Law                                                  | Government                          |
| Product Control Act                                                                                                       | promotes ecodesign, addresses marine plastic pollution                                                                             | 1970                       | Norway           | Law                                                  | Government                          |
| London Convention on the Prevention of Marine Pollution by Dumping of Wastes and Other Matter (London Dumping Convention) | eliminate sea-based sources of plastic pollution                                                                                   | 1972                       | global           | Convention                                           | International Maritime Organisation |
| Clean Water Act                                                                                                           | regulates water pollution                                                                                                          | 1972                       | USA              | Law                                                  | Government                          |
| Convention on the Prevention of Marine Pollution by Dumping of Wastes and Other matter                                    | introduces the black and grey list as a means of pollutants classification                                                         | 1972                       | China            | Law                                                  | Government                          |
| Law Concerning Special Measures for Conservation of the Environment of the Seto Inland Sea                                | recent amendments to remove and reduce MPL                                                                                         | 1973                       | Japan            | Law                                                  | Government                          |
| Mediterranean Action Plan                                                                                                 | addresses issues related to marine environmental degradation                                                                       | 1975                       | Regional         | Plan                                                 | UNEP                                |
| Convention for the Protection of the Mediterranean Sea Against Pollution - Barcelona Convention                           | prevent marine pollution from ships and aircrafts                                                                                  | 1976                       | Regional         | Convention                                           | UNEP                                |
| Coast watch Europe                                                                                                        | focuses on monitoring and surveying coastal areas across                                                                           | 1980                       | Regional         | Initiative                                           |                                     |

|                                                                                      |                                                                                                                                                           |      |           |            |                                        |
|--------------------------------------------------------------------------------------|-----------------------------------------------------------------------------------------------------------------------------------------------------------|------|-----------|------------|----------------------------------------|
|                                                                                      | Europe. Volunteers collect data on various environmental parameters, including plastic and litter pollution, to support research and conservation efforts |      |           |            |                                        |
| Abidjan Convention                                                                   | Development of a Regional Marine Litter Action Plan for the West, Central and Southern African region                                                     | 1981 | Regional  | Convention | Government                             |
| Marine Pollution Prevention Act                                                      | marine pollution, waste disposal                                                                                                                          | 1981 | Sri Lanka | Law        | Government                             |
| The UN Convention on the Law of the Seas (UNCLOS)                                    | prevent, reduce and control pollution from any source                                                                                                     | 1982 | Global    | Convention | UN General Assembly                    |
| South Asian Centre for Environmental Programme                                       | regional efforts on environmental issues                                                                                                                  | 1982 | Regional  | Initiative |                                        |
| Art. 45/ the Marine Environment Protection Law                                       | banning on opening new industries that pollute the marine environment                                                                                     | 1982 | China     | Law        | Government                             |
| International Coastal Cleanup                                                        | engages volunteers from around the world to clean up coastlines and waterways while collecting data on the types and quantities of debris                 | 1986 | Global    | Initiative | Ocean Conservancy                      |
| Marine Plastic Pollution Research and Control Act                                    | research and monitoring, measures to prevent and control plastic pollution in marine environment                                                          | 1987 | USA       | Law        | Government                             |
| International Convention for the Prevention of Pollution from Ships (MARPOL) Annex V | regulations to prevent and reduce marine pollution by garbage, including plastics and microplastics, from ships                                           | 1988 | Global    | Convention | UN International Maritime Organization |
| Shore Protection Act                                                                 | prevent debris in coastal areas                                                                                                                           | 1988 | USA       | Law        | Government                             |

|                                                                   |                                                                                                                                                        |      |           |            |             |
|-------------------------------------------------------------------|--------------------------------------------------------------------------------------------------------------------------------------------------------|------|-----------|------------|-------------|
| Marine Protection, Research and Sanctuaries Act                   | prevent ocean dumping                                                                                                                                  | 1988 | USA       | Law        | Government  |
| Waste Disposal Act                                                | EPR, Recycling fund, requires citizens to sort their waste into different categories, including plastics, and provides incentives for proper recycling | 1988 | Taiwan    | Law        | Government  |
| Prevention of Pollution of the Sea Act                            | disposal of waste                                                                                                                                      | 1990 | Singapore | Law        | Authorities |
| Operation Clean Sweep                                             | reduce plastic pellet loss into the environment                                                                                                        | 1991 | Global    | Initiative | NGO         |
| Urban Wastewater Treatment Directive (91/271/EEC)                 | A proposal has been made in 2022 to address MPs pollution                                                                                              | 1991 | Regional  | Law        | EC          |
| OSPAR Convention                                                  | prevent and mitigate marine pollution from land-based and marine sources                                                                               | 1992 | Regional  | Convention |             |
| Black Sea Commission - Bucharest Convention                       | control land-based and marine-based sources of pollution                                                                                               | 1992 | Regional  | Convention |             |
| WasteWise Program                                                 | promote use and reuse of materials                                                                                                                     | 1994 | USA       | Program    | EPA         |
| Prevention and Control of Environmental Pollution by Solid Wastes | plastic waste management, circular design, recycling of packaging, restrictions of SUP                                                                 | 1995 | China     | Law        | Government  |
| Plastic Bag Regulation and Control Directive                      | importation, production, storage, sale, distribution of plastic bags with thickness <20 µm, some municipalities implemented bans since 1994            | 2011 | Nepal     | Law        | Government  |
| Nairobi Convention                                                | Development of a Regional Marine Litter Action Plan for the Western Indian Ocean Region                                                                | 1996 | regional  | Convention | Government  |

|                                                                                     |                                                                                                                                                    |      |                      |            |                |
|-------------------------------------------------------------------------------------|----------------------------------------------------------------------------------------------------------------------------------------------------|------|----------------------|------------|----------------|
| Act on the Promotion of Sorted Collection and Recycling of Containers and Packaging | efficient use of recycled containers and packages, reduction of wastes                                                                             | 1997 | Japan                | Law        | Government     |
| Ban on plastic bags                                                                 | non-compostable plastic bags <50 µm                                                                                                                | 1998 | India                | Law        | Municipalities |
| Environment Act                                                                     | addresses pollution including from waste                                                                                                           | 1998 | Solomon Islands      | Law        | Government     |
| Green Labelling Scheme                                                              | sustainable and circular product design                                                                                                            | 1999 | Singapore            | Initiative | NGO            |
| Canadian Environmental Protection Act                                               | regulates substances, including MPs, that may be harmful to human health, later amendments to ban single-use plastics and microbeads in toiletries | 1999 | Canada               | Law        | Government     |
| Re-cycled Plastics Manufacture and Usage Rules                                      | improved labelling, use of pigments, where recycled plastic can be used                                                                            | 1999 | India                | Law        | Government     |
| Plastics Manufacture, Sale and Usage Rules                                          | Regulates usage, composition of products using recycled plastic                                                                                    | 1999 | India                | Law        | Government     |
| Environmental Protection and Management Act                                         | tackles pollution and waste at source                                                                                                              | 1999 | Singapore            | Law        | Government     |
| UAE Federal Law 24/1999 on the Protection and Development of the Environment        | prohibits intentional disposal of pollutants from any source in the marine environment                                                             | 1999 | United Arab Emirates | Law        | Government     |
| Environment Protection and Biodiversity Conservation Act                            | marine debris that is harmful to vertebrate marine life                                                                                            | 1999 | Australia            | Law        | Government     |
| National Recycling programme                                                        | recycling bins and collection services                                                                                                             | 2001 | Singapore            | Law        | Government     |

|                                                |                                                                                                                                                             |      |           |            |                          |
|------------------------------------------------|-------------------------------------------------------------------------------------------------------------------------------------------------------------|------|-----------|------------|--------------------------|
| Plastic bottles to light sources               | reuse plastic bottles to improve lighting in closed rooms                                                                                                   | 2002 | Brazil    | Initiative | Citizen                  |
| Ban on single-use plastics                     | Initial ban on plastic bags and utensils; later amended to ban other SUP such as over-packaging, plastic trays, cups, bottles, tableware, straws until 2019 | 2002 | Taiwan    | Law        | Government               |
| Icelandic Recycling Fund                       | implement the polluter pays principle, implementation of EPR as part of EEA, reduce the volume of waste, promote reuse and recovery                         | 2002 | Iceland   | Law        | Government               |
| Ghost Nets Initiative                          | marine debris and beach cleanups, data collection, financial support                                                                                        | 2004 | Australia | Initiative | Government               |
| Australian Marine Debris Initiative            | beach cleanup by volunteers, education and prevention of plastic pollution                                                                                  | 2004 | Australia | Initiative | Tangaroa Blue Foundation |
| Single use plastic ban                         |                                                                                                                                                             | 2004 | Rwanda    | Law        | Authorities              |
| Law [limiting] Dumping in Mexican Marine Areas | requires permit for any dumping into marine waters                                                                                                          | 2004 | Mexico    | Law        | Government               |
| International Pellet Watch                     | involve volunteers to collect data on persistent organic pollutants and plastic pollution                                                                   | 2005 | Global    | Initiative | NGO                      |
| Container Deposit Scheme                       | payback for PET bottles                                                                                                                                     | 2005 | Kiribati  | Law        | Government               |
| CAFTA-DR and Panama Environmental Cooperation  | strengthen solid waste management on land-based sources of ocean plastic pollution                                                                          | 2005 | Regional  | Program    | Stakeholders             |
| Australasian Recycling Label                   | eases the recycling process, helps with education on                                                                                                        | 2006 | Australia | Campaign   | NGOs                     |

|                                                                                                |                                                                                                                                                                       |      |              |            |                                         |
|------------------------------------------------------------------------------------------------|-----------------------------------------------------------------------------------------------------------------------------------------------------------------------|------|--------------|------------|-----------------------------------------|
|                                                                                                | recycling                                                                                                                                                             |      |              |            |                                         |
| Marine Debris Research, Prevention and Reduction Act                                           | supports programs to determine sources, assess, reduce and prevent marine debris                                                                                      | 2006 | USA          | Law        | Government                              |
| NOAA marine Debris Program                                                                     | prevent marine debris, cleanup, outreach and education                                                                                                                | 2006 | USA          | Program    | National Oceanic and Atmospheric Agency |
| Local clean-up actions                                                                         | clean-up plastic waste                                                                                                                                                | 2007 | China        | Initiative | Ministries and Municipalities           |
| Regulation on the registration, evaluation, authorization and restriction of chemicals (REACH) | phasing out or restricting substances of very high concern towards human health and the environment, amendments in 2023 for restrictions on use of all MPs below 5 mm | 2007 | Regional     | Law        | EC                                      |
| Zero Waste SG                                                                                  | education and awareness on food waste, plastic disposables, household recycling, organizational waste                                                                 | 2008 | Singapore    | Initiative |                                         |
| 5-Gyres                                                                                        | education and awareness, research on micro and macroplastic marine pollution, land-based and sea-based sources, innovation, design, alternatives                      | 2008 | Global       | Initiative |                                         |
| National Environmental Management Waste Act                                                    | EPR, waste reduction, reuse, recycling, recovery                                                                                                                      | 2008 | South Africa | Law        | Government                              |
| Circular Economy Promotion Law                                                                 | industry should implement circular economy                                                                                                                            | 2008 | China        | Law        | Government                              |
| Marine Strategy Framework Directive (Directive 2008/56/EC)                                     | protect the Europe's marine waters, prevent and reduce pollution, including from plastics                                                                             | 2008 | Regional     | Law        | EC                                      |

|                                           |                                                                                                                                                       |      |           |            |                                                   |
|-------------------------------------------|-------------------------------------------------------------------------------------------------------------------------------------------------------|------|-----------|------------|---------------------------------------------------|
| EU Waste Framework Directive (2008/98/EC) | reuse and recycling of plastic wastes                                                                                                                 | 2008 | Regional  | Law        | EC                                                |
| Plastic Pollution Coalition               | reduce plastic pollution, advocates for policies and practices that address microplastics and promote sustainable alternatives to single-use plastics | 2009 | Global    | Coalition  |                                                   |
| Ban on plastic bags                       |                                                                                                                                                       | 2009 | Bhutan    | Law        | Government                                        |
| National Waste Policy                     | mitigate the impact of marine debris, addresses litter by reducing its quantity, improving recycling, ensure producer responsibility                  | 2009 | Australia | Law        | Government                                        |
| Sustainable Materials Management Program  | generation, recycling, composting, combustion                                                                                                         | 2009 | USA       | Program    | EPA                                               |
| Zero Waste Europe                         | promotes circular economy, raise awareness, request more stringent regulations                                                                        | 2010 | Regional  | Initiative | NGOs                                              |
| Law 22-10                                 | use of degradable and biodegradable bags, encourages alternatives to plastic                                                                          | 2010 | Marrocco  | Law        | Government                                        |
| National Solid Waste Management Policy    | ban on discharges of any kind of waste on beaches and sea                                                                                             | 2010 | Brazil    | Law        | Government                                        |
| Marine Resources Act                      | forbids dumping of fishing gear                                                                                                                       | 2010 | Norway    | Law        | Government                                        |
| Strategic Plan for Biodiversity           |                                                                                                                                                       | 2011 | Global    | Plan       | Parties to the Convention on Biological Diversity |
| Partial ban on single use plastics        | ban on production, importation, possession and commercial use of non-biodegradable plastics                                                           | 2011 | Togo      | Law        | Government                                        |
| Honolulu Strategy                         | prevent land-based plastic waste                                                                                                                      | 2011 | Global    | Strategy   | UNEP                                              |



|                                                                                          |                                                                                                                                                                                                                                                                                                              |      |               |            |            |
|------------------------------------------------------------------------------------------|--------------------------------------------------------------------------------------------------------------------------------------------------------------------------------------------------------------------------------------------------------------------------------------------------------------|------|---------------|------------|------------|
|                                                                                          | from leaking into oceans                                                                                                                                                                                                                                                                                     |      |               |            |            |
| Global Partnership on Plastic Pollution and Marine Litter                                | aims to reduce the leakage of plastics into the ocean through improved design; promotes the application of the '3Rs' principle (reduce, re-use, recycle); encourages 'closed-loop' systems and circular production cycles; promotes maximization of resource efficiency and minimization of waste generation | 2012 | Global        | Coalition  | UNEP       |
| Ban on plastic bags                                                                      |                                                                                                                                                                                                                                                                                                              | 2012 | Cameroon      | Law        | Government |
| Partial ban on single use plastics                                                       | ban on production, importation, possession and commercial use of non-biodegradable plastic bags                                                                                                                                                                                                              | 2012 | Mali          | Law        | Government |
| Ban on plastic bags                                                                      | import and usage                                                                                                                                                                                                                                                                                             | 2012 | Afghanistan   | Law        | Government |
| Environmental Conservation Law                                                           | addresses waste treatment                                                                                                                                                                                                                                                                                    | 2012 | Myanmar       | Law        | Government |
| Oyster buoys policy                                                                      |                                                                                                                                                                                                                                                                                                              | 2012 | Taiwan        | Law        | Government |
| Honolulu Strategy: A Global Framework for the Prevention and Management of Marine Debris | reduce the impact of marine debris, including plastic                                                                                                                                                                                                                                                        | 2012 | Global        | Strategy   | UNEP       |
| Ocean Cleanup initiative                                                                 | reduce marine plastic pollution, innovative solutions                                                                                                                                                                                                                                                        | 2013 | Global        | Initiative |            |
| The Great Nurdle Hunt                                                                    | collect nurdles from the beach                                                                                                                                                                                                                                                                               | 2013 | Global        | Initiative | NGO        |
| Partial ban on single use plastics                                                       | ban on production, importation, possession, commercialization and use of non-biodegradable plastic bags made of lightweight polyethylene or similar plastic                                                                                                                                                  | 2013 | Cote D'ivoire | Law        | Government |

|                                                     |                                                                                                                                                                                                                                                     |      |               |          |            |
|-----------------------------------------------------|-----------------------------------------------------------------------------------------------------------------------------------------------------------------------------------------------------------------------------------------------------|------|---------------|----------|------------|
|                                                     | derivates with <50 µm thickness                                                                                                                                                                                                                     |      |               |          |            |
| Environmental Tax                                   | duty tax on plastic products                                                                                                                                                                                                                        | 2013 | Ghana         | Law      | Government |
| Partial ban on single use plastics                  | non-biodegradable plastics                                                                                                                                                                                                                          | 2013 | Guinea-Bissau | Law      | Government |
| Finance Act                                         | Ecotax on plastics material use, manufacturing and import; aims to reduce plastic pollution in the terrestrial and marine ecosystems; increase recycling rates; the funds would be used to support projects on innovative technologies and outreach | 2013 | Marrocco      | Law      | Government |
| Partial ban on single use plastics                  | ban on production, use and importing of non-biodegradable plastic bags                                                                                                                                                                              | 2013 | Mauritania    | Law      | Government |
| Partial ban on single use plastics                  | ban on low density plastic and packaging bags                                                                                                                                                                                                       | 2013 | Niger         | Law      | Government |
| Extended Producer Responsibility Act                | amendments for EPR for plastic packaging                                                                                                                                                                                                            | 2013 | Chile         | Law      | Government |
| Circular Economy Development Strategies Action Plan | tangible goals to reach circular economy                                                                                                                                                                                                            | 2013 | China         | Law      | Government |
| ban on plastic bags                                 | manufacturing, sale, importation, purchase and use of non-biodegradable plastic bags                                                                                                                                                                | 2013 | Pakistan      | Law      | Government |
| Waste Prevention Programme for England              | reduce waste, circular economy                                                                                                                                                                                                                      | 2013 | UK            | Program  | Government |
| Recycling                                           | helped informal waste pickers to segregate recyclable materials, offered protection and support                                                                                                                                                     | 2014 | India         | Campaign | NGO        |

|                                                             |                                                                                                                                                                            |      |           |            |                     |
|-------------------------------------------------------------|----------------------------------------------------------------------------------------------------------------------------------------------------------------------------|------|-----------|------------|---------------------|
| Tax                                                         | Tax on some imported plastic materials                                                                                                                                     | 2014 | Ghana     | Law        | Government          |
| Extended Producer Responsibility                            | enforced in various regions of Canada depending on regulations and acts                                                                                                    | 2014 | Canada    | Law        | Government          |
| Research and Innovation Programme Horizon 2020              | financial support for projects to prevent marine litter and reduce its impact                                                                                              | 2014 | Regional  | Program    | EC                  |
| Global Ghost Gear Initiative                                | support work in combating marine debris                                                                                                                                    | 2015 | Global    | Coalition  | Stakeholders        |
| Sector Agreement for Reverse Logistics System for Packaging | ensures an environmentally friendly final destination for packaging                                                                                                        | 2015 | Brazil    | Convention | Government          |
| Beach clean-up initiative                                   | Afroz Shah has initiated door-to-door campaigns and mobilized over 5000 volunteers to join the movement                                                                    | 2015 | India     | Initiative | Citizens            |
| Reef 2050 Long-Term Sustainability Plan                     | addresses plastic pollution and water quality                                                                                                                              | 2015 | Australia | Plan       | Government          |
| G7 Action Plan to Combat Marine Litter                      | addresses land and sea-based sources of pollution, promotes infrastructure development, promotes education and awareness, stakeholder engagement, supports removal actions | 2015 | Global    | Plan       | UNEP, G7            |
| Sustainable Development Goal 14                             | Target 14.1 on marine pollution                                                                                                                                            | 2015 | Global    | Plan       | UN General Assembly |
| Circular Economy Action Plan (COM/2015/614 final)           | Part of the Green Deal, targets product design, circular economy processes, sustainable consumption, waste prevention                                                      | 2015 | Regional  | Plan       | EC                  |

|                                                 |                                                                                                                                                                                               |      |              |            |            |
|-------------------------------------------------|-----------------------------------------------------------------------------------------------------------------------------------------------------------------------------------------------|------|--------------|------------|------------|
| HELCOM Regional Action Plan for Marine Litter   | addresses marine litter, including plastic; increase awareness, stakeholder engagement, sustainable consumption and production, improved solid waste management; support in research projects | 2015 | Regional     | Plan       | Helcom     |
| Partial ban on single use plastics              | non-biodegradable plastic packages, plastic bags                                                                                                                                              | 2015 | Burkina Faso | Law        | Government |
| Zero Mika Law (77-15)                           | prohibit production, import and sale or distribution of single use plastic bags                                                                                                               | 2015 | Marrocco     | Law        | Government |
| Partial ban on single use plastics              | ban on plastic bags < 30 µm                                                                                                                                                                   | 2015 | Senegal      | Law        | Government |
| Partial ban on single use plastics              | plastic bags                                                                                                                                                                                  | 2015 | The Gambia   | Law        | Government |
| Presidential Decree 38/2015 on waste management | cooperation between Government and Business Entities                                                                                                                                          | 2015 | Indonesia    | Law        | Government |
| Plastic Bags Directive (2015/720)               | reduce the use of lightweight plastic carrier bags (< 50 µm) by means such as, bans, charges, biodegradable alternatives, education and awareness, proper labelling                           | 2015 | regional     | Law        | EC         |
| Keep Norway Beautiful                           | cleanup campaigns, involve volunteers, raise awareness and education                                                                                                                          | 2016 | Norway       | Campaign   | NGO        |
| Planet Patrol                                   | cleanup of plastic, engage communities, raise awareness, education                                                                                                                            | 2016 | global       | Initiative | Citizens   |
| Plastic Waste Management Rules                  | aims to reduce land-based sources of unmanaged plastic waste by: EPR for plastic                                                                                                              | 2016 | India        | Law        | Government |

|                                                 |                                                                                                  |      |                   |            |                                         |
|-------------------------------------------------|--------------------------------------------------------------------------------------------------|------|-------------------|------------|-----------------------------------------|
|                                                 | packaging, ban on SUP                                                                            |      |                   |            |                                         |
| Municipal Waste Recycling Program               | reduce land-based sources of ocean plastic pollution                                             | 2016 | regional          | Program    | US Agency For International Development |
| national Sanitation implementation Strategy     | improve waste collection from households                                                         | 2016 | Rwanda            | Strategy   | Rwanda Environment Management Authority |
| BeadRecede campaign                             | Voluntary phase-out of microbeads from rinse-off cosmetics, personal care and cleaning products  | 2017 | Australia         | Campaign   | Government                              |
| World Aquariums Against Marine Litter           | raise awareness on marine plastic litter                                                         | 2017 | Global            | Campaign   | EC                                      |
| Ban on certain SUPs                             | prohibition to import, sale and use SUPs such as egg cartons, bags, food containers and utensils | 2017 | Antigua & Barbuda | Initiative | Government                              |
| National Sword initiative                       | ban the import of recyclable wastes, including plastics                                          | 2017 | China             | Initiative | Government                              |
| National Beach Clean-up Public Welfare Campaign | involvement of volunteers in beach cleanups, promotes education                                  | 2017 | China             | Initiative | China Ocean Development Foundation      |
| Our Singapore Reefs                             | cleanup                                                                                          | 2017 | Singapore         | Initiative |                                         |
| BYO Singapore                                   | discounts when customers bring their own reusable bags, bottles and containers                   | 2017 | Singapore         | Initiative |                                         |
| Zero waste project                              | refund scheme and charges for plastic bags                                                       | 2017 | Turkey            | Initiative | Government                              |

|                                                            |                                                                                                                                                                                          |      |                 |            |            |
|------------------------------------------------------------|------------------------------------------------------------------------------------------------------------------------------------------------------------------------------------------|------|-----------------|------------|------------|
| Plastic Wise Gizo women's group                            | education, reuse of plastic waste                                                                                                                                                        | 2017 | Solomon Islands | Initiative | NGOS       |
| UNEP Clean Seas Campaign                                   | combat marine plastic pollution, including MPs, promote sustainable practice, reduce plastic waste                                                                                       | 2017 | Global          | Initiative | UNEP       |
| Marine Ecological Environment Protection Plan              | preventing damage from pollution, prevent and control solid waste on beaches, marine litter clean-up system, education and awareness                                                     | 2017 | China           | Plan       | Government |
| National Plan of Action on Marine Plastic Debris 2017-2025 | 70% reduction of marine plastic relative to business as usual                                                                                                                            | 2017 | Indonesia       | Plan       | Ministries |
| G20 Action Plan to Combat Marine Litter                    | addresses land and sea-based sources of pollution, prevention re reduction, improved waste management, cleanup, innovative technologies, education and outreach, research and monitoring | 2017 | Global          | Plan       | G20        |
| UNEA resolution on marine litter and MPs                   | combat litter and MPs from all sources                                                                                                                                                   | 2017 | Global          | Plan       | UNEP       |
| Partial ban on single use plastics                         | plastic bags                                                                                                                                                                             | 2017 | Cape Verde      | Law        | Government |
| Ban on plastic bags                                        | prohibits manufacturing, sale, and use of plastic bags                                                                                                                                   | 2017 | Kenya           | Law        | Government |
| Solid Waste Management Law                                 | circular economy, EPR, recovery of solid waste, reduction, valorization and management of solid waste, including plastic, prevent and reduce generation of waste                         | 2017 | Peru            | Law        | Government |

|                                                             |                                                                                                                                                   |      |                 |          |            |
|-------------------------------------------------------------|---------------------------------------------------------------------------------------------------------------------------------------------------|------|-----------------|----------|------------|
| Microbead-Free Waters Act                                   | bans the production of cosmetics with microbeads                                                                                                  | 2017 | USA             | Law      | Government |
| Regulation on the safety standards of cosmetics             | ban on solid plastics below 5 mm in cosmetics and cleaning and laundry products                                                                   | 2017 | South Korea     | Law      | Government |
| Regulations no. 2034/33                                     | prohibition on production, sale, and use of certain SUPs, prohibition on open burning of waste and other combustible materials including plastics | 2017 | Sri Lanka       | Law      | Government |
| ban on plastic bags                                         | import, sale and use of polyethylene bags < 20 µm and styrofoam containers                                                                        | 2017 | Sri lanka       | Law      | Government |
| Marine Debris Governance Platform and resulting Action Plan | educate, lobby the public and launch a large-scale monitoring programme                                                                           | 2017 | Taiwan          | Law      | Government |
| Ban on microbeads                                           | in rinse-off personal care products                                                                                                               | 2017 | UK              | Law      | Government |
| Fisheries Management Act                                    | includes a section on pollution from fishery activities                                                                                           | 2017 | Solomon Islands | Law      | Government |
| One Island, One Voice programme                             | clean-up of marine litter                                                                                                                         | 2017 | Indonesia       | Program  | Citizens   |
| Strategy to phase out all forms of single-use plastics      |                                                                                                                                                   | 2017 | Costa Rica      | Strategy | Government |
| Litter Strategy for England                                 | reduce litter and littering, education and awareness, improve enforcement, better cleaning and access to bins                                     | 2017 | UK              | Strategy | Government |

|                                                        |                                                                                                  |      |                 |            |                                  |
|--------------------------------------------------------|--------------------------------------------------------------------------------------------------|------|-----------------|------------|----------------------------------|
| National Waste Management & Pollution Control Strategy | addresses all form of waste, including waste and pollution in the marine environment             | 2017 | Solomon Islands | Strategy   | Government                       |
| Citarum Harum campaign                                 | extensive clean-up                                                                               | 2018 | Indonesia       | Campaign   | Military And Civilian Volunteers |
| EU Beach Cleanup campaign                              | involvement of volunteers from several countries across EU for beach cleanups                    | 2018 | regional        | Campaign   | EC                               |
| Plastics Pact Network                                  | plastic circular economy                                                                         | 2018 | global          | Coalition  | NGO                              |
| Clean Ocean Material Alliance                          | develop fishing gear easy to recycle, pilot projects to reduce marine plastics                   | 2018 | Japan           | Convention | Private Sector                   |
| Egypt Ban Plastic initiative                           | certain SUPs, find alternatives, reuse, reduce, recycle, beach cleanups, awareness and education | 2018 | Egypt           | Initiative | NGO                              |
| Less Plastic, More Life                                | promotes responsible consumption of SUPs, education and awareness                                | 2018 | Peru            | Initiative |                                  |
| Plastics Innovation Challenge                          | coordinates initiatives on plastic recycling, degradation, upcycling and design for circularity  | 2018 | USA             | Initiative | US Department of Energy          |
| Face the Sea                                           | gather plastics from coasts                                                                      | 2018 | Indonesia       | Initiative | Citizens                         |
| The Big Microplastic Survey                            | involve volunteers to collect data on MP pollution                                               | 2018 | UK              | Initiative |                                  |
| Keep Britain Tidy                                      | education and awareness                                                                          | 2018 | UK              | Initiative | Government                       |



|                                                                                                                  |                                                                                                                                                                                                                                                                                                                                                                                                                                                                                                                                                                                                        |      |              |            |                                            |
|------------------------------------------------------------------------------------------------------------------|--------------------------------------------------------------------------------------------------------------------------------------------------------------------------------------------------------------------------------------------------------------------------------------------------------------------------------------------------------------------------------------------------------------------------------------------------------------------------------------------------------------------------------------------------------------------------------------------------------|------|--------------|------------|--------------------------------------------|
| UK Plastics Pact                                                                                                 | addresses plastic packaging, reusable, recyclable or compostable                                                                                                                                                                                                                                                                                                                                                                                                                                                                                                                                       | 2018 | UK           | Initiative | Government                                 |
| Australian Packaging Covenant                                                                                    | helps to increase recycling rates, phase out SUP in packaging, targets specifically packaging made of PET, HDPE and PP                                                                                                                                                                                                                                                                                                                                                                                                                                                                                 | 2018 | Australia    | Initiative | Australian Packaging Covenant Organization |
| National action plan for sustainable management of Marine Litter in the Red Sea coast of Kingdom of Saudi Arabia | Public awareness campaigns, engagement plans with key stakeholders, evaluation of enforcement mechanisms, adequacy of port reception facilities at the red sea, developing and monitoring flagship demonstration actions, engage private companies to phase out single use plastic bags, water bottles, straws, etc., plan for coastal land owners to regularly collect litter plastic from their area of operation, re-survey beaches with baseline data, support local marine research institutes to protect coastal marine environment from littering in addition to training and capacity building | 2018 | Saudi Arabia | Plan       | Government                                 |
| Plastic Waste Management Road Map                                                                                | use 100% recycled plastic                                                                                                                                                                                                                                                                                                                                                                                                                                                                                                                                                                              | 2018 | Thailand     | Plan       | Government                                 |
| Provincial Action Plans on Marine Litter                                                                         | cleanup of marine plastic litter, involvement of stakeholders                                                                                                                                                                                                                                                                                                                                                                                                                                                                                                                                          | 2018 | Turkey       | Plan       | Government                                 |

|                                                                         |                                                                                                                                                                                                                                                                           |      |                      |         |            |
|-------------------------------------------------------------------------|---------------------------------------------------------------------------------------------------------------------------------------------------------------------------------------------------------------------------------------------------------------------------|------|----------------------|---------|------------|
| Partial ban on single use plastics                                      | non-biodegradable plastics                                                                                                                                                                                                                                                | 2018 | Benin                | Law     | Government |
| Charges on plastic shopping bags                                        |                                                                                                                                                                                                                                                                           | 2018 | China                | Law     | Government |
| Act on Promoting the Treatment of Debris that Drift Ashore              | provision on MPs, reduction of microbeads in scrubs                                                                                                                                                                                                                       | 2018 | Japan                | Law     | Government |
| Microbeads ban                                                          |                                                                                                                                                                                                                                                                           | 2018 | Taiwan               | Law     | Government |
| Import restrictions on waste materials                                  |                                                                                                                                                                                                                                                                           | 2018 | Taiwan               | Law     | Government |
| Fishing net waste recycling                                             |                                                                                                                                                                                                                                                                           | 2018 | Taiwan               | Law     | Government |
| Federal Law (No. 12/2018) for the Integrated Waste Management           | promotes reduction of waste generation, encourages reuse of waste, circular economy                                                                                                                                                                                       | 2018 | United Arab Emirates | Law     | Government |
| Environmental Law amendment                                             | EPR, prevention of waste                                                                                                                                                                                                                                                  | 2018 | Turkey               | Law     | Government |
| National Ocean Policy                                                   | addresses ocean threats, including plastic, polluter Pays Principle, improved management                                                                                                                                                                                  | 2018 | Solomon Islands      | Law     | Government |
| Strategy for Plastics in a Circular Economy (COM/2018/028 final)        | promotes improved design for improved recycling, investment in innovative technologies and training, effective collection systems, prevent MPs from reaching the environment, decreased marine plastic litter, creates viable markets for recycled and renewable plastics | 2018 | regional             | Law     | EC         |
| Norwegian Development Program to Combat Marine Litter and Microplastics | offers financial support for projects and initiatives on land-based waste management, new technologies, increase awareness, provide necessary training, with a focus on Asian                                                                                             | 2018 | Norway               | Program | Government |

|                                                                           |                                                                                                                                                   |      |                      |            |                                          |
|---------------------------------------------------------------------------|---------------------------------------------------------------------------------------------------------------------------------------------------|------|----------------------|------------|------------------------------------------|
|                                                                           | and African countries                                                                                                                             |      |                      |            |                                          |
| National Waste Management Strategy and Master Plan                        | reduce, reuse, recycle, identify top 10 priority plastic items leaking into the environment                                                       | 2018 | Myanmar              | Strategy   | Government                               |
| Plastics Smart                                                            | education and awareness on marine plastic pollution                                                                                               | 2019 | Japan                | Campaign   | Government                               |
| National Plastic Action Partnership                                       | public-private collaboration, investment, innovation, education and awareness, metrics                                                            | 2019 | Indonesia            | Coalition  | Government                               |
| Coalition Circle Pledge to Transform Plastic Recycling Model in Abu Dhabi | closed loop economy to tackle waste pollution, improve collection and recycling of packaging, improved infrastructure, sustainable solutions      | 2019 | United Arab Emirates | Coalition  | Government                               |
| Ocean Plastics Leadership Network                                         | promotes stakeholder engagement, EPR, cleanups, alternative solutions, improved recycling infrastructure, reuse, recycling, sustainable solutions | 2019 | global               | Coalition  |                                          |
| Litter Control and Prevention Act                                         | education, reduction of littering                                                                                                                 | 2019 | Antigua & Barbuda    | Initiative | Government                               |
| Chilean Plastic Pact                                                      | rethink the future of plastic design, eliminate plastic packaging and SUP                                                                         | 2019 | Chile                | Initiative | Ministry Of Environment, Fundación Chile |
| Umigomi Zero Week                                                         | involvement of volunteers in cleanup                                                                                                              | 2019 | Japan                | Initiative | Government & The Nippon                  |

|                                                                                         |                                                                                                                                                                                                                                                                                      |      |               |            |                     |
|-----------------------------------------------------------------------------------------|--------------------------------------------------------------------------------------------------------------------------------------------------------------------------------------------------------------------------------------------------------------------------------------|------|---------------|------------|---------------------|
|                                                                                         |                                                                                                                                                                                                                                                                                      |      |               |            | Foundation          |
| Plastic bag to sleeping mats                                                            | Initiative to provide sleeping mats for the homeless with the help of citizens                                                                                                                                                                                                       | 2019 | South Africa  | Initiative | ONG                 |
| Basel Convention Plastic Wastes Amendments                                              | clarifies the types of plastic wastes; defines the conditions for plastic wastes trade, strengthen national infrastructure to collect, recycle and dispose of plastic wastes, waste prevention and minimization, technical assistance and guidelines in for plastic waste management | 2019 | global        | Convention | UN Basel Convention |
| Action Plan to Reduce Plastic Pollution in the Oslo Fjord                               | combat plastic pollution                                                                                                                                                                                                                                                             | 2019 | Norway (Oslo) | Plan       | City of Oslo        |
| National Action Plan for Marine Plastic Litter                                          | improved waste management systems, prevention of littering, illegal dumping, and unintentional leakage into ocean, collection of scattered on land, innovative solutions, removal of plastic liter from the oceans, awareness and stakeholder involvement, research, monitoring      | 2019 | Japan         | Plan       | Government          |
| Zero Waste Masterplan                                                                   | key strategies to increase sustainability, resource efficiency and resilience towards climate, 70% overall recycling rate, EPR framework                                                                                                                                             | 2019 | Singapore     | Plan       | Authorities         |
| Circular on the Preparation and Implementation of Marine Litter Provincial Action Plans | involvement of stakeholders                                                                                                                                                                                                                                                          | 2019 | Turkey        | Plan       | Government          |

|                                                                          |                                                                                                                                      |      |              |      |            |
|--------------------------------------------------------------------------|--------------------------------------------------------------------------------------------------------------------------------------|------|--------------|------|------------|
| National Plastics Plan                                                   | reduce plastic waste and increase recycling rates, find alternatives for plastic, consumer education                                 | 2019 | Australia    | Plan | Government |
| Naples Ministerial Declaration                                           | one priority action is to reduce marine litter, including to reduce plastic leakage in the Mediterranean Sea                         | 2019 | regional     | Plan | UNEP       |
| Ban on plastic bags                                                      |                                                                                                                                      | 2019 | South Africa | Law  | Government |
| Law to combat plastic pollution and protect the environment (9786/2019)  | circular economy, prevention, reduction, reuse, recovery, treatment, disposal and education, ban on SUPs                             | 2019 | Costa Rica   | Law  | Government |
| National Sustainable Waste Management Bill                               | management of solid waste, reduction, recycling and reuse,                                                                           | 2019 | Mexico       | Law  | Government |
| Law that Regulates Single-Use Plastic and Disposable Containers          | migrate to reusable, recyclable and biodegradable goods, reduce impact on environment of SUPs, circular economy, ban on certain SUPs | 2019 | Peru         | Law  | Government |
| India-Norway Marine Pollution Initiative                                 | increase awareness, clean-up, pilot project to use plastic waste as fuel                                                             | 2019 | India        | Law  | Government |
| Guidelines for Harmonizing Ocean Surface Microplastic Monitoring Methods |                                                                                                                                      | 2019 | Japan        | Law  | Government |
| Revised Alternate and Renewable Energy Policy                            | supports the efforts for waste to energy                                                                                             | 2019 | Pakistan     | Law  | Government |
| National Policy on Waste Management                                      | includes all types of waste                                                                                                          | 2019 | Sri Lanka    | Law  | Government |
| Product Regulations                                                      | bans certain SUPs, marking requirements for some products                                                                            | 2019 | Norway       | Law  | Government |

|                                                                  |                                                                                                                                                                                                                                                                                                                                                                               |      |              |          |                                         |
|------------------------------------------------------------------|-------------------------------------------------------------------------------------------------------------------------------------------------------------------------------------------------------------------------------------------------------------------------------------------------------------------------------------------------------------------------------|------|--------------|----------|-----------------------------------------|
| Procedures and Principles Regarding the Charging of Plastic Bags |                                                                                                                                                                                                                                                                                                                                                                               | 2019 | Turkey       | Law      | Government                              |
| EU Directive on Single-Use Plastics (Directive (EU) 2019/904)    | reduce the impact of certain plastic products on the environment, particularly the marine environment, EPR, enhanced product designs, ban on certain SUP (bud sticks, tableware, straws, EPS cups and lids), ban on oxo-degradable products, improved labelling for disposal, minimum annual collection rates of fishing gear with plastic, education and increased awareness | 2019 | regional     | Law      | EC                                      |
| Port Reception Facilities Directive (2019/883/EU)                | regulates the delivery of wastes from ships, amendments according to the provisions of MARPOL Conventions Annex V                                                                                                                                                                                                                                                             | 2019 | regional     | Law      | EC                                      |
| Eco-design Directive (2019/1009)                                 | prevent accumulation of plastic in the environment                                                                                                                                                                                                                                                                                                                            | 2019 | regional     | Law      | EC                                      |
| Pilot programs to transform plastic into bricks and roads        |                                                                                                                                                                                                                                                                                                                                                                               | 2019 | South Africa | Program  |                                         |
| Clean Cities, Blue Ocean                                         | reducing plastic pollution in the ocean                                                                                                                                                                                                                                                                                                                                       | 2019 | global       | Program  | US Agency For International Development |
| Pacific Ocean Litter Project                                     | reduce marine plastic litter, particularly SUP                                                                                                                                                                                                                                                                                                                                | 2019 | regional     | Program  | Government                              |
| Private Sector Partnerships                                      | private sector investment in the recycling value chain in South and SE Asia                                                                                                                                                                                                                                                                                                   | 2019 | regional     | Program  | US Agency For International Development |
| National Strategy for Waste Reduction and Recovery               | promotes circular economy, sets targets for recycling                                                                                                                                                                                                                                                                                                                         | 2019 | Marrocco     | Strategy | Government                              |

|                                                                |                                                                                                                                                                   |      |           |            |             |
|----------------------------------------------------------------|-------------------------------------------------------------------------------------------------------------------------------------------------------------------|------|-----------|------------|-------------|
| Clean Production Agreement                                     | encourages alternatives to SUPs                                                                                                                                   | 2020 | Peru      | Convention | Government  |
| Zero Plastic Waste Initiative                                  | Supports financially projects dealing with innovative solutions to prevent plastic pollution, capturing plastics, involving citizen science in plastic life cycle | 2020 | Canada    | Initiative | Government  |
| Development of National Inventory of Plastic Waste in Pakistan |                                                                                                                                                                   | 2020 | Pakistan  | Initiative | Government  |
| Ellipsis Earth                                                 | involves volunteers to identify and quantify plastic litter, contributing to research and promoting action against plastic pollution in the UK                    | 2020 | UK        | Initiative | NGO         |
| Environmental Protection Regulations                           | control of SUPs, ban plastic bags, PET bottle permit, EPR (in preparation)                                                                                        | 2020 | Mauritius | Law        | Government  |
| Ban on SUPs                                                    | implementation at local levels                                                                                                                                    | 2020 | Mexico    | Law        | Government  |
| Roadmap towards a circular economy in the industrial sector    | develop and incorporate circular economy models in value chains, improved labeling                                                                                | 2020 | Peru      | Law        | Government  |
| Ban on SUP                                                     | Ban certain SUP, such as plastic tableware, plastic swabs, straws, non-degradable plastic bag, daily chemical products with plastic microbeads                    | 2020 | China     | Law        | Government  |
| Taxes and bans on single-use plastic                           |                                                                                                                                                                   | 2020 | Indonesia | Law        | Government  |
| Charge for plastic shopping bags                               |                                                                                                                                                                   | 2020 | Japan     | Law        | Government  |
| Mandatory Packaging Reporting                                  | report on type of material, the weight and the 3R plans                                                                                                           | 2020 | Singapore | Law        | Authorities |
| Ban on single-use plastic bags                                 |                                                                                                                                                                   | 2020 | Thailand  | Law        | Government  |

|                                        |                                                                                                                                                                                                         |      |                   |            |                                                 |
|----------------------------------------|---------------------------------------------------------------------------------------------------------------------------------------------------------------------------------------------------------|------|-------------------|------------|-------------------------------------------------|
| Restriction on certain SUP             | restrict the supply of plastic straws, plastic drink stirrers and plastic-stemmed cotton buds                                                                                                           | 2020 | UK                | Law        | Government                                      |
| Recycling and Waste Reduction Act      | part of the National Plastics Plan                                                                                                                                                                      | 2020 | Australia         | Law        | Government                                      |
| Drinking Water Directive (2020/2184)   | promotes the use of tap water in order to reduce plastic bottles reliance and ultimately plastic waste in the environment                                                                               | 2020 | regional          | Law        | EC                                              |
| Recycled Plastics for Food Packaging   | assists manufacturers to safely use recycled plastics for food containers                                                                                                                               | 2020 | USA               | Program    | US Food and Drug Administration                 |
| Small Grant Programme on Plastic waste | financial support for grants on plastic waste, reduce marine plastic waste, recycling, awareness                                                                                                        | 2020 | global            | Program    | Basel Convention & Stockholm Convention Centers |
| National Waste Management Strategy     | circular economy, prevent waste, ensure zero-waste in 15 years                                                                                                                                          | 2020 | South Africa      | Strategy   | Government                                      |
| Plastic Free Fiji Campaign             | raise awareness on the impact of plastic on marine resources, promote reduction of single use plastics, provide options for recycling plastic bottles, provide alternatives for single use plastic bags | 2021 | Fiji              | Campaign   | NGO                                             |
| National Bottle deposit scheme         | encourages buyback system for PET bottles to ensure that bottles are recycled and reused                                                                                                                | 2021 | Antigua & Barbuda | Initiative | Government                                      |
| Nationwide awareness campaign          | raising awareness regarding the plastic ban legislation                                                                                                                                                 | 2021 | Bangladesh        | Initiative | Environment And Social Development Organization |



|                                                                             |                                                                                                                                                                                                          |      |              |            |                                        |
|-----------------------------------------------------------------------------|----------------------------------------------------------------------------------------------------------------------------------------------------------------------------------------------------------|------|--------------|------------|----------------------------------------|
| Clean SG Day                                                                | offers cleaners a day of rest and aims to increase vigilance about littering and waste management                                                                                                        | 2021 | Singapore    | Initiative | Public Hygiene Council                 |
| Adopt-a-beach project                                                       | coastal cleanup, involvement of stakeholders, awareness                                                                                                                                                  | 2021 | South Korea  | Initiative | Government                             |
| Australian Circular Economy Hub                                             | promotes education and implementation of circular economy                                                                                                                                                | 2021 | Australia    | Initiative | Government                             |
| Australia, New Zealand, and Pacific Island Countries (ANZPAC) Plastics Pact | provides support in forming regulation regarding packaging design and material circularity, achieve recycling targets                                                                                    | 2021 | regional     | Initiative | Industry, Government and Civil Society |
| Plastics Master Plans                                                       | tackle plastic pollution and achieve sustainable production and consumption of plastics                                                                                                                  | 2021 | South Africa | Plan       | Government                             |
| National Marine Waste Plan                                                  | prevent pollution from land-based and sea-based sources, education, awareness, research, monitoring, innovation                                                                                          | 2021 | Costa Rica   | Plan       | Government                             |
| Regional Action Plan on Marine Litter in the Arctic                         | combat marine litter, including MPs and plastic debris                                                                                                                                                   | 2021 | regional     | Plan       | Government                             |
| National Action Plan on marine litter and marine contaminated sediment      | addresses various marine litter including MPs, resource circulation, prevention, improved collection, improved infrastructure strengthens management system, improved recycling, education and awareness | 2021 | South Korea  | Plan       | Government                             |
| National action plan on rivers and estuaries                                | reduce pollution from land-based sources of waste                                                                                                                                                        | 2021 | South Korea  | Plan       | Government                             |

|                                                                             |                                                                                                                                                                                                                                                                                                         |      |                 |         |            |
|-----------------------------------------------------------------------------|---------------------------------------------------------------------------------------------------------------------------------------------------------------------------------------------------------------------------------------------------------------------------------------------------------|------|-----------------|---------|------------|
| National Action Plan on Plastic Waste Management                            | reduce marine plastic pollution (micro and macroplastic) from land-based sources, preparation of policies and strategies                                                                                                                                                                                | 2021 | Sri Lanka       | Plan    | Government |
| Norwegian Directorate of Fisheries' Action Plan                             | reduce marine litter from fishing                                                                                                                                                                                                                                                                       | 2021 | Norway          | Plan    | Government |
| National Plastics Action Plan                                               | recovery and recycling, phase out hard to recycle SUP, supports transition to a low-carbon circular economy, public campaigns                                                                                                                                                                           | 2021 | New Zealand     | Plan    | Government |
| Recycling & Waste Management Association Strategic Plan                     | reduce, reuse, recycle and return principles, supports research in collection, waste management and recycling                                                                                                                                                                                           | 2021 | Solomon Islands | Plan    | Government |
| Plastic Pollution Control Action Plan                                       | promotes green designs to improve safety and recycling performance, supports technological innovation, monitoring and investigation of marine plastic litter and MPs, cleanups, research activities, increase recycling plastic waste, improve waste collection and separation, education and awareness | 2021 | China           | Law     | Government |
| Waste Management Law                                                        | reduce, separate and recycle waste, EPR, circular economy                                                                                                                                                                                                                                               | 2021 | Saudi Arabia    | Law     | Government |
| Carrier bag charge                                                          | charges in supermarkets on single-use carrier bags                                                                                                                                                                                                                                                      | 2021 | UK              | Law     | Government |
| Roadmap for Development, Introduction and diffusion of Marine Biodegradable | financial support for projects proposing innovative solutions                                                                                                                                                                                                                                           | 2021 | Japan           | Program | Government |

|                                                                |                                                                                                                              |      |                      |           |              |
|----------------------------------------------------------------|------------------------------------------------------------------------------------------------------------------------------|------|----------------------|-----------|--------------|
| Bio-based Plastics                                             |                                                                                                                              |      |                      |           |              |
| Singapore Third Country Training Program                       | promotes integrated solid waste management strategies relating to plastic pollution                                          | 2021 | Singapore            | Program   | Government   |
| National MPs Monitoring Program                                | levels and types of MPs                                                                                                      | 2021 | Norway               | Program   | Government   |
| Research and Innovation Programme Horizon Europe               | financial support for projects to prevent and eliminate litter, plastics and MPs                                             | 2021 | Regional             | Program   | EC           |
| National Strategy for Marine Waste and Microplastic Management | reduce the discharge of plastic waste into ecosystems and reduce environmental impact of plastics throughout the lifecycle   | 2021 | Chile                | Strategy  | Government   |
| National Recycling Strategy                                    | increase the recycling rate to 50 % by 2030, circular economy                                                                | 2021 | USA                  | Strategy  | EPA          |
| Norwegian Plastics Strategy                                    | reduce plastic pollution, from land-based and sea-based sources, cleanup marine litter, reduce use of SUPs, circular economy | 2021 | Norway               | Strategy  | Government   |
| Waste Management and Resource Recovery Strategy                | mitigate the impact of plastic                                                                                               | 2021 | Kiribati             | Strategy  | Government   |
| Marine debris 'picking up + jogging' campaign                  | collect litter on the beach while jogging, awareness                                                                         | 2022 | South Korea          | Campaign  |              |
| Clean Up UAE                                                   | cleanup of beaches, ports, coastal areas                                                                                     | 2022 | United Arab Emirates | Campaign  | NGO          |
| Business Coalition for a Global Plastics Treaty                | reduce plastic production and use, circular economy, prevent and reduce MP and macroplastics leakage into the environment    | 2022 | Global               | Coalition | Stakeholders |
| High Ambition Coalition to End Plastic Pollution               | restrain plastic consumption and production to sustainable                                                                   | 2022 | Global               | Coalition | Governments  |

|                                                                                                 |                                                                                                                                                                                                                                                                     |      |             |            |                                                   |
|-------------------------------------------------------------------------------------------------|---------------------------------------------------------------------------------------------------------------------------------------------------------------------------------------------------------------------------------------------------------------------|------|-------------|------------|---------------------------------------------------|
|                                                                                                 | levels, enable circular economy for plastic, management and recycling of plastic waste,                                                                                                                                                                             |      |             |            |                                                   |
| SEA circular project                                                                            | inspire market-based solutions and encouraged policies to solve marine plastic pollution at the source                                                                                                                                                              | 2022 | Regional    | Initiative | UNEP & Coordinating Body on The Seas of East Asia |
| Swachh Sagar, Surakshit Sagar (Clean Coast Safe Sea)                                            | involvement of volunteers for beach cleanups and collection of scientific data                                                                                                                                                                                      | 2022 | India       | Initiative |                                                   |
| National Marine Litter Policy                                                                   | monitor litter in water ecosystems, use remote sensing and AI techniques, develop circular economy solutions, implement EPR to reduce, reuse and recycle plastics, management and mitigation measures, ecolabel certification, reduce and control sea-based sources | 2022 | India       | Plan       | Government                                        |
| UNEP Resolution 5/14 End plastic pollution: Towards an international legally binding instrument | combat marine plastic pollution                                                                                                                                                                                                                                     | 2022 | Global      | Plan       | UNEP                                              |
| Ban on plastic bags                                                                             | polyethylene plastic bags                                                                                                                                                                                                                                           | 2002 | Bangladesh  | Law        | Government                                        |
| Act on Promotion of Resource Circulation for Plastics                                           | guidelines for design of products, rationalized use, accelerate collection and recycling of plastics                                                                                                                                                                | 2022 | Japan       | Law        | Government                                        |
| Ban on SUPs                                                                                     | cups, straws, bags                                                                                                                                                                                                                                                  | 2022 | South Korea | Law        | Government                                        |

|                                                                                             |                                                                                                                                   |      |                      |            |             |
|---------------------------------------------------------------------------------------------|-----------------------------------------------------------------------------------------------------------------------------------|------|----------------------|------------|-------------|
| Single Use Plastic Policies                                                                 | charges for single-use bags, find alternatives for single-use bags, ban on certain SUPs starting with 2024                        | 2022 | United Arab Emirates | Law        | Government  |
| Climate Change Act                                                                          | net zero for greenhouse gas emissions, reduce generation of wastes                                                                | 2022 | UK                   | Law        | Government  |
| Plastic Packaging Tax                                                                       | on plastic packaging that contains less than 30% recycled plastic                                                                 | 2022 | UK                   | Law        | Government  |
| Customs & Excise (Import Duties) (Amendment No.2/Order 2021)                                | Taxes on imports of certain SUPs                                                                                                  | 2022 | Solomon Islands      | Law        | Government  |
| National Integrated Marine Pollution Monitoring Program                                     | includes macro and microplastics                                                                                                  | 2022 | Turkey               | Program    | Government  |
| National Action Strategy for Marine Litter                                                  | reduce land-based and sea-based sources of litter, circular economy, R&D                                                          | 2022 | Singapore            | Strategy   | Government  |
| Marine Litter Strategy                                                                      | reduce litter sources, improve behaviour, litter removal, improve monitoring                                                      | 2022 | UK                   | Strategy   | Government  |
| Osaka Blue Ocean Vision - G20 Implementation Framework for Actions on Marine Plastic Litter | addresses marine plastic pollution, including MPs, improved waste management, recycling and innovation in materials and packaging | 2022 | global               | Strategy   | Governments |
| Tell me! + Pick up!' Campaign                                                               | marine debris reporting system, collection of small trash                                                                         | 2023 | South Korea          | Campaign   |             |
| Last stop: the ocean                                                                        | raise public awareness on marine litter, including plastic                                                                        | 2023 | regional             | Initiative | Governments |
| Environmental protection amendment Bill                                                     | return bottles to collection points                                                                                               | 2023 | Antigua & Barbuda    | Initiative | Government  |

|                                              |                                                                                                                                    |                |                 |            |                                      |
|----------------------------------------------|------------------------------------------------------------------------------------------------------------------------------------|----------------|-----------------|------------|--------------------------------------|
| No Thank You campaign                        | reduce plastic waste, raise awareness                                                                                              | 2023           | Myanmar         | Initiative | NGOS                                 |
| Beach clean-up initiative                    | cleanups of plastic pollution on reefs and beaches, removal of fishing nets and plastic debris                                     | 2023           | USA             | Initiative | US Fish and Wildlife Service, US DOI |
| EU Action against microplastics              | plans to reduce MPs in the environment with 30%, clearly identify unintentional sources, support research in reducing MP pollution | 2023           | regional        | Plan       | EC                                   |
| Waste Management and Resource Recovery Act   | sustainable and integrated management of waste, monitor, collection, treatment and disposal                                        | 2023           | Mauritius       | Law        | Government                           |
| General Law of Circular Economy Initiative   | minimize waste generation, promotes reuse, remanufacturing and recycling                                                           | 2023           | Mexico          | Law        | Government                           |
| Environmental Improvement Act                | EPR for packaging, deposit return schemes, control over export of plastic waste and charges for single-use items                   | 2023           | UK              | Law        |                                      |
| Plastic Regulation on single-use plastic ban | addresses certain SUPs                                                                                                             | 2023           | Solomon Islands | Law        | Government                           |
| Analytical monitoring of MPs                 | financial support for project                                                                                                      | 2023           | Mauritius       | Program    | Government                           |
| National Recycling Strategy                  | integral management of solid waste                                                                                                 | 2023           | Costa Rica      | Strategy   | Government                           |
| National Strategy to replace SUPS            | use renewable and compostable alternatives                                                                                         | 2023           | Costa Rica      | Strategy   | Government                           |
| Circular Economy Strategy                    | includes plastic packaging                                                                                                         | 2023           | UK              | Strategy   | Government                           |
| National Plastic Action Plan                 | addresses SUPs                                                                                                                     | In development | Myanmar         | Plan       | Government                           |

|                                                                                                       |                                                                                                |                   |                      |            |            |
|-------------------------------------------------------------------------------------------------------|------------------------------------------------------------------------------------------------|-------------------|----------------------|------------|------------|
| Draft National Marine Litter Action Plan developed under CLIP (Commonwealth Litter Program)           |                                                                                                | In development    | Solomon Islands      | Plan       | Government |
| Roadmap towards a Circular Economy in the Fishing and Aquaculture Subsectors                          | circular economy                                                                               | In development    | Peru                 | Law        | Government |
| National Strategy of the Circular Economy                                                             | clean technologies                                                                             | In development    | Costa Rica           | Strategy   | Government |
| National Strategy for Reducing Plastic and Other Waste in Waterways and Oceans                        | reduce plastic waste entering oceans, reduce, reuse, collect and capture                       | In development    | USA                  | Strategy   | EPA        |
| Communication Education and Public Awareness Strategy                                                 | education and awareness                                                                        | In development    | Kiribati             | Strategy   | Government |
| Proposal for regulation to prevent plastic pellet losses to reduce microplastic pollution (2023/0373) | prevent spills of plastic pellets and cleanup in case of an event                              | Not issued yet    | Regional             | Law        | EC         |
| National Action Plan for Marine Debris and Plastic Pollution                                          |                                                                                                | Under development | Mexico               | Law        | Government |
| Beach cleanup campaigns                                                                               | cleanups and awareness                                                                         |                   | South Africa         | Campaign   | ONG        |
| Clean-up the Gulf                                                                                     |                                                                                                |                   | United Arab Emirates | Campaign   | NGO        |
| National cleanup days                                                                                 | cleanup of beaches and mangrove areas                                                          |                   | Antigua & Barbuda    | Initiative | Government |
| Closing the Plastic Tap                                                                               | solutions to address recyclable and unrecyclable plastic waste leaking into marine environment |                   | Antigua & Barbuda    | Initiative | Government |
| Save Beaches campaign                                                                                 | reduce plastic litter on beaches,                                                              |                   | Peru                 | Initiative |            |

|                                           |                                                                                                             |  |             |            |                                                            |
|-------------------------------------------|-------------------------------------------------------------------------------------------------------------|--|-------------|------------|------------------------------------------------------------|
|                                           | education                                                                                                   |  |             |            |                                                            |
| Ocean Plastics - ocean, Coasts & Seashore | beach clean-ups and educational programs                                                                    |  | USA         | Initiative | National Park Service, US Department of Interior           |
| Adopt program                             | citizens manage and clean local public areas to which they show strong attachment                           |  | Japan       | Initiative |                                                            |
| Beach clean-up                            | involve young people in cleanup, education and awareness on SUPs and how they can reduce, reuse and recycle |  | Myanmar     | Initiative | Government & NGOs                                          |
| Sunday Stop campaign                      | raise awareness on SUPs                                                                                     |  | Myanmar     | Initiative | Government                                                 |
| park and Beach Clean-up                   |                                                                                                             |  | Singapore   | Initiative | National Environment Agency and The Public Hygiene Council |
| Save Food Cut Waste                       | part of Zero Waste SG                                                                                       |  | Singapore   | Initiative |                                                            |
| Zero Waste School                         | Part of Zero Waste SG, includes environmental education in schools                                          |  | Singapore   | Initiative |                                                            |
| Coastal garbage monitoring                | data collection on waste type and weight (including plastic) on the coast                                   |  | South Korea | Initiative | Government                                                 |
| Use of ICT                                | monitoring system using satellites and drones                                                               |  | South Korea | Initiative | Government                                                 |
| Great British Beach Clean                 | beach cleanup by volunteers, raise awareness, education                                                     |  | UK          | Initiative | Marine Conservation Society                                |



|                                                                                    |                                                                                                             |  |                 |            |            |
|------------------------------------------------------------------------------------|-------------------------------------------------------------------------------------------------------------|--|-----------------|------------|------------|
| Pickathon Cleanup                                                                  | cleanup of beaches and public areas                                                                         |  | Kiribati        | Initiative | Government |
| Beach clean-up                                                                     | cleanup, education and awareness                                                                            |  | Solomon Islands | Initiative | NGOs       |
| Educational programs                                                               | turning plastics to artworks for fun a sale                                                                 |  | Nigeria         | Initiative | SMEs       |
| Marine Ecology protection Publicity Campaign in Schools                            | increase awareness regarding marine plastic pollution                                                       |  | China           | Law        | Government |
| Waste Regulation                                                                   | mandatory sorting of plastic waste, recycling improved design of sports pitches to reduce MP emissions, EPR |  | Norway          | Law        | Government |
| Building Capacity for Environmentally Sound Management of Plastic Waste in Senegal | reduce plastic waste leakage into the marine environment from Senegal                                       |  | Senegal         | Program    | Government |
| Peru Limpio Strategy                                                               | education on solid waste, responsible consumption, recycling among other environmental issues               |  | Peru            | Strategy   |            |
